# Supplementary material
Source: MDPI journal article supplement (https://www.mdpi.com/2571-550X/3/2/14)
Supplement: s1 [file s1]

**Table S1.** Summary of micromorphological properties of each sample.

| Sample                  | Aggregates                                                                                                   | Voids                                                                                             | Microstructure                                          | Coarse components                                                                                                                                                   | Fine material   | b-fabric                                                                                         |
|-------------------------|--------------------------------------------------------------------------------------------------------------|---------------------------------------------------------------------------------------------------|---------------------------------------------------------|---------------------------------------------------------------------------------------------------------------------------------------------------------------------|-----------------|--------------------------------------------------------------------------------------------------|
| <i>Canal A - 1</i>      | common granular, frequent centimetric subangular blocky                                                      | common planar voids, vesicles, channels and vughs; rare chambers                                  | granular to subangular blocky                           | common subrounded heterometric carbonate rocks fragments and quartz, very few subrounded igneous minerals; weakly weathered carbonate rock fragments (lithorelicts) | yellowish brown | crystallitic                                                                                     |
| <i>Canal A - 2</i>      | few unseparated granular, common centimetric unseparated subangular blocky                                   | few planar voids, vesicles, channels and vughs; rare chambers                                     | massive                                                 | common subrounded heterometric carbonate rocks fragments and quartz, very few subrounded igneous minerals; weakly weathered carbonate rock fragments (lithorelicts) | yellowish brown | crystallitic                                                                                     |
| <i>Canal A - 3</i>      | common centimetric heterometric unseparated subangular blocky                                                | few planar voids, vesicles, channels and vughs; rare chambers                                     | massive                                                 | common subrounded heterometric carbonate rocks fragments and quartz, rare strongly weathered sandstone fragments                                                    | greyish brown   | crystallitic                                                                                     |
| <i>Canal C - top</i>    | dominant angular to subangular blocky with weak separation and high pedality and accommodation               | common planar voids, vesicles and vughs; rare chambers                                            | subangular blocky                                       | common subrounded heterometric carbonate rocks fragments and quartz, very few subrounded igneous minerals; weakly weathered carbonate rock (lithorelicts)           | yellowish brown | yellowish crystallitic; darker, undifferentiated or granostriated associated to igneous minerals |
| <i>Canal C - bottom</i> | dominant angular to subangular blocky with weak separation and high pedality and accommodation               | common planar voids, vesicles and vughs; rare chambers                                            | subangular blocky                                       | common subrounded heterometric carbonate rocks fragments and quartz, very few subrounded igneous minerals; weakly weathered carbonate rock (lithorelicts)           | yellowish brown | yellowish crystallitic; darker, undifferentiated or granostriated associated to igneous minerals |
| <i>Canal 2 - bottom</i> | dominant unseparated subangular blocky                                                                       | few planar voids and vughs                                                                        | massive                                                 | rare carbonate rock fragments, quartz and igneous minerals                                                                                                          | brown           | crystallitic                                                                                     |
| <i>STR41 - top A</i>    | common centimetric subangular blocky                                                                         | common planar voids, vughs, chambers and vesicles; rare channels                                  | massive to subangular blocky                            | common heterometric angular quartz and carbonate rock fragments, moderately weathered; common igneous minerals                                                      | brown           | undifferentiated to crystallitic                                                                 |
| <i>STR41 - top B</i>    | common granular; few, locally common centimetric subangular blocky                                           | common construction and planar voids, vughs and channels; rare chambers and vesicles              | massive to granular, locally subangular blocky          | common heterometric angular quartz and carbonate rock fragments, moderately weathered; common igneous minerals                                                      | brown           | undifferentiated to crystallitic                                                                 |
| <i>STR41 - bottom</i>   | dominant subangular blocky with high accommodation and moderate pedality (dominant platy in the upper level) | common vughs, channels, chambers and vesicles (common horizontal planar voids in the upper level) | massive to subangular blocky (platy in the upper level) | frequent heterometric angular quartz and carbonate rock fragments, moderately weathered; rare igneous minerals                                                      | yellowish brown | crystallitic, locally striated                                                                   |
| <i>B266</i>             | dominant subangular blocky with high accommodation and moderate pedality                                     | frequent channels, chambers, vesicles and vughs                                                   | subangular blocky                                       | few angular quartz; rare carbonate rock fragments and igneous minerals                                                                                              | reddish brown   | undifferentiated to granostriated, locally crystallitic                                          |
| <i>B267</i>             | dominant subangular blocky with high accommodation and moderate pedality                                     | frequent channels, chambers, vesicles and vughs                                                   | subangular blocky                                       | few angular quartz; rare carbonate rock fragments and igneous minerals                                                                                              | yellowish brown | undifferentiated to granostriated, locally crystallitic                                          |
| <i>B271</i>             | common millimetric granular; frequent centimetric subangular blocky with high accommodation                  | frequent channels, planar voids, chambers, vesicles and vughs                                     | granular                                                | few angular quartz; rare carbonate rock fragments and igneous minerals                                                                                              | reddish brown   | undifferentiated to granostriated, locally crystallitic                                          |
| <i>Bedrock (crusta)</i> | dominant rounded blocky                                                                                      | frequent construction voids, few                                                                  | massive                                                 | few rounded carbonate rock fragments                                                                                                                                | yellowish brown | crystallitic                                                                                     |

channels and chambers

**Table S1.** Summary of micromorphological properties of each sample.

| <i>Sample</i>           | <b>Organic and anthropogenic components</b>                                                                                           | <b>Bioturbation pedofeatures</b>                                                                 | <b>Calcite-bearing pedofeatures</b>                                                                                                                                                                                             | <b>Other pedofeatures</b>                                                                                                              |
|-------------------------|---------------------------------------------------------------------------------------------------------------------------------------|--------------------------------------------------------------------------------------------------|---------------------------------------------------------------------------------------------------------------------------------------------------------------------------------------------------------------------------------|----------------------------------------------------------------------------------------------------------------------------------------|
| <i>Canal A - 1</i>      | frequent microcharcoals and shell fragments                                                                                           | -                                                                                                | few coatings (rare pendants) and hypocoatings around voids and grains; rare incomplete infillings; rare centimetric typical and geodic nodules, weakly weathered; rare clustered acicular crystals                              | very few reddish brown pedorelicts rich in igneous minerals; rare yellowish-brown concentric iron oxide nodules with irregular margins |
| <i>Canal A - 2</i>      | common microcharcoals and rare shell fragments                                                                                        | -                                                                                                | common coatings (rare pendants) and hypocoatings around voids and grains; frequent impregnations; very few incomplete infillings; very few centimetric typical nodules with irregular margins; rare clustered acicular crystals | few clustered reddish brown pedorelicts rich in igneous minerals                                                                       |
| <i>Canal A - 3</i>      | few microcharcoals and organic pigment impregnations                                                                                  | -                                                                                                | common coatings (rare pendants) and hypocoatings around voids and grains; common impregnations; very few incomplete infillings; very few centimetric typical nodules with irregular margins; rare clustered acicular crystals   | very few clustered yellowish brown pedorelicts rich in igneous minerals                                                                |
| <i>Canal C - top</i>    | rare microcharcoals and shell fragments                                                                                               | rare ellipsoidal faecal pellets in voids                                                         | few coatings around voids and grains; rare incomplete infillings; rare millimetric typical and geodic nodules, weakly weathered                                                                                                 | -                                                                                                                                      |
| <i>Canal C - bottom</i> | rare microcharcoals and shell fragments                                                                                               | rare ellipsoidal faecal pellets in voids; compaction hypocoatings in channels (passage features) | frequent coatings and hypocoatings around voids and grains; very few incomplete infillings; very few centimetric typical and geodic nodules, weakly weathered; rare clustered acicular crystals                                 | rare fragmented clay coatings (papulae)                                                                                                |
| <i>Canal 2 - bottom</i> | few, locally abundant microcharcoals                                                                                                  | -                                                                                                | common impregnations; few infillings and rounded nodules                                                                                                                                                                        | dominant horizontal sub-millimetric to centimetric laminations                                                                         |
| <i>STR41 - top A</i>    | common microcharcoals, partially burnt bone fragments, unburned plant material; rare concentrations of sometimes vitrified phytoliths | -                                                                                                | rare coatings and impregnations; rare moderately weathered nodules; rare pseudomorphic oxalate aggregates                                                                                                                       | -                                                                                                                                      |
| <i>STR41 - top B</i>    | common microcharcoals and rare shell fragments                                                                                        | -                                                                                                | frequent coatings and hypocoatings around voids and grains; frequent impregnations and infillings; few typical nodules; rare alteromorphic oxalate nodules                                                                      | rare yellow microlaminated, strongly birefringent clay coatings on carbonate rock fragments                                            |
| <i>STR41 - bottom</i>   | rare microcharcoals and shell fragments                                                                                               | ovoid faecal pellets and compaction hypocoatings in channels (passage features)                  | frequent coatings and hypocoatings around voids and grains; few impregnations and infillings; very few typical nodules; rare druses                                                                                             | few subrounded dark brown pedorelicts rich in amorphous organic matter and microcharcoals with external compression hypocoatings       |
| <i>B266</i>             | very few microcharcoals; rare shell fragments                                                                                         | rare ellipsoidal faecal pellets in voids                                                         | few coatings, incomplete infillings and impregnations; very few typical and geodic millimetric nodules                                                                                                                          | rare amorphous iron oxides nodules and impregnations; rare pedorelicts similar to the groundmass                                       |
| <i>B267</i>             | few microcharcoals; rare shell fragments                                                                                              | rare ellipsoidal faecal pellets in voids                                                         | frequent impregnations; very few coatings and incomplete infillings; very few typical and geodic millimetric nodules                                                                                                            | rare amorphous iron oxides nodules and impregnations; rare reddish pedorelicts rich in organic material                                |
| <i>B271</i>             | Very few microcharcoals                                                                                                               | rare ellipsoidal faecal pellets in voids                                                         | few coatings and hypocoatings                                                                                                                                                                                                   | -                                                                                                                                      |
| <i>Bedrock (crusta)</i> | -                                                                                                                                     | -                                                                                                | few rounded nodules; dominant coatings and infillings superimposed on each other                                                                                                                                                | rare fine silty-loamy pedorelicts rich in organic matter, microcharcoal and igneous minerals; fine stromatolite-like laminations       |
